# Supplementary material
Source: Springer Nature journal article supplement (https://www.springermedizin.de/resource/supplementary/12936_2013_3036_MOESM7_ESM.pdf/9544902)

**Mean Parasitaemia: 32%, Standard deviation: 10%**

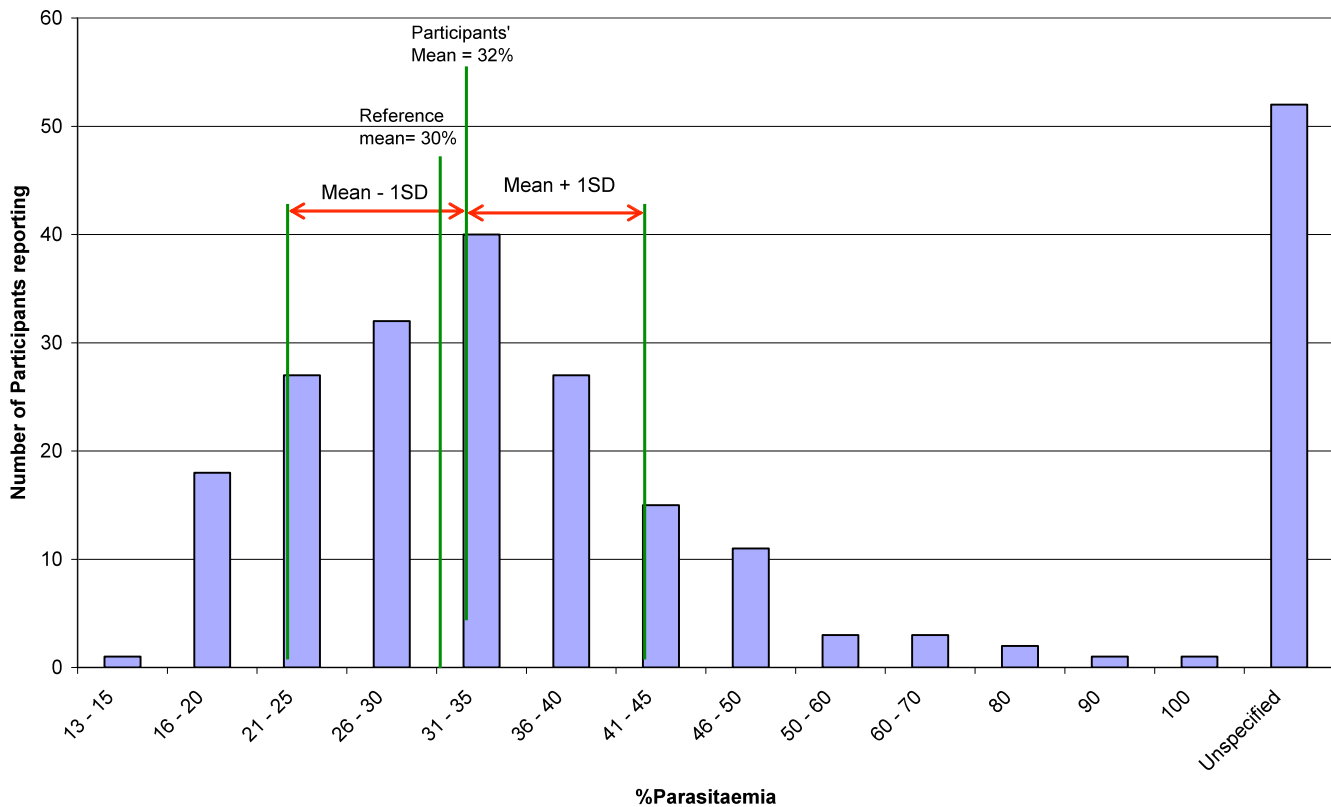

Supplement: MOESM7 [file 9544902]
